1 **Article title:**

2 Efficacy and safety of ensitrelvir in patients with mild-to-moderate COVID-19: the phase 2b part  
3 of a randomized, placebo-controlled, phase 2/3 study

4

5 **Authors:**

6 Hiroshi Mukae<sup>1</sup>, Hiroshi Yotsuyanagi<sup>2</sup>, Norio Ohmagari<sup>3</sup>, Yohei Doi<sup>4,5</sup>, Hiroki Sakaguchi<sup>6</sup>,  
7 Takuhiro Sonoyama<sup>6</sup>, Genki Ichihashi<sup>6</sup>, Takao Sanaki<sup>7</sup>, Keiko Baba<sup>7</sup>, Yuko Tsuge<sup>6</sup>, Takeki  
8 Uehara<sup>6\*</sup>

9

10 **Affiliations:**

11 <sup>1</sup>Department of Respiratory Medicine, Nagasaki University Graduate School of Biomedical  
12 Sciences, Nagasaki, Japan

13 <sup>2</sup>The Institute of Medical Science, The University of Tokyo, Tokyo, Japan

14 <sup>3</sup>Disease Control and Prevention Center, National Center for Global Health and Medicine,  
15 Tokyo, Japan

16 <sup>4</sup>Division of Infectious Diseases, University of Pittsburgh School of Medicine, Pittsburgh,  
17 Pennsylvania, USA

18 <sup>5</sup>Departments of Microbiology and Infectious Diseases, Fujita Health University School of  
19 Medicine, Toyoake, Japan

20 <sup>6</sup>Drug Development and Regulatory Science Division, Shionogi & Co., Ltd., Osaka, Japan

21 <sup>7</sup>Pharmaceutical Research Division, Shionogi & Co., Ltd., Toyonaka, Japan

22

23 **\*Corresponding author:**

24 Takeki Uehara

25 Drug Development and Regulatory Science Division, Shionogi & Co., Ltd.

26 Address: 8F, Nissay Yodoyabashi East, 3-3-13 Imabashi, Chuo-ku, Osaka 541-0042, Japan

27 Email: [takeki.uehara@shionogi.co.jp](mailto:takeki.uehara@shionogi.co.jp)

28 Telephone: +81-6-6209-6907

29

30 **Abstract**

31 This phase 2b part of a randomized phase 2/3 study assessed the efficacy and safety of ensitrelvir  
32 for mild-to-moderate coronavirus disease 2019 (COVID-19). Patients were randomized (1:1:1)  
33 to orally receive ensitrelvir fumaric acid 125 mg (375 mg on day 1;  $n=140$ ) or 250 mg (750 mg  
34 on day 1;  $n=140$ ) or placebo ( $n=141$ ) once daily for 5 days. Compared with placebo, the change  
35 from baseline in severe acute respiratory syndrome coronavirus 2 titer (measured as  $\log_{10}$  50%  
36 tissue-culture infectious dose) on day 4 was significantly greater with ensitrelvir 125 mg and  
37 250 mg (differences from placebo: -0.41,  $P<0.0001$  for both). The total score of predefined 12  
38 COVID-19 symptoms showed an improving trend with ensitrelvir treatment without a significant  
39 intergroup difference. Most adverse events were mild in severity. Ensitrelvir treatment  
40 demonstrated a favorable antiviral efficacy and potential clinical benefit with an acceptable  
41 safety profile. (Japan Registry of Clinical Trials identifier: jRCT2031210350)

42

43 **Keywords:** COVID-19, ensitrelvir, S-217622, SARS-CoV-2 3C-like protease inhibitor, viral  
44 titer

45 **Main**

46 Coronavirus disease 2019 (COVID-19), caused by infection with severe acute respiratory  
47 syndrome coronavirus 2 (SARS-CoV-2), has been declared a global pandemic by the World  
48 Health Organization (WHO) ([https://www.who.int/emergencies/diseases/novel-coronavirus-](https://www.who.int/emergencies/diseases/novel-coronavirus-2019)  
49 [2019](https://www.who.int/emergencies/diseases/novel-coronavirus-2019)). As of May 25, 2022, more than 520 million confirmed cases of COVID-19 have been  
50 reported worldwide, with over 6 million COVID-19–associated deaths (<https://covid19.who.int/>).  
51 To combat the COVID-19 pandemic, several vaccines against SARS-CoV-2 infection have been  
52 developed and approved for clinical use<sup>1-4</sup>, and more than 11 billion vaccine doses have been  
53 administered to the worldwide population (<https://covid19.who.int/>). However, humoral immune  
54 response against SARS-CoV-2, as measured by neutralizing antibody titers, decreases  
55 substantially with time after vaccination<sup>5</sup>, potentially leading to postvaccination infections<sup>6</sup>.  
56 Therefore, in addition to vaccines, effective antiviral agents are needed for the management of  
57 the COVID-19 pandemic.

58 Gene mutations in the SARS-CoV-2 genome have resulted in the emergence of various  
59 variants, of which those posing an increased risk to global health are referred to as variants of  
60 concern (VOCs). The SARS-CoV-2 Omicron (B.1.1.529) variant was first detected in South  
61 Africa in November 2021, quickly spread worldwide, and was designated as a VOC by the WHO  
62 ([https://www.who.int/news/item/26-11-2021-classification-of-omicron-\(b.1.1.529\)-sars-cov-2-](https://www.who.int/news/item/26-11-2021-classification-of-omicron-(b.1.1.529)-sars-cov-2-variant-of-concern)  
63 [variant-of-concern](https://www.who.int/news/item/26-11-2021-classification-of-omicron-(b.1.1.529)-sars-cov-2-variant-of-concern)). By the end of January 2022, >99% of SARS-CoV-2 cases reported in the  
64 United States (US) had been infected with the Omicron variant<sup>7</sup>. This variant is characterized by  
65 more than 30 mutations located in its spike protein, of which 15 are focused on the receptor-  
66 binding domain<sup>8</sup>. Mutations in the receptor-binding domain of the spike protein result in high  
67 binding affinity with human angiotensin-converting enzyme 2, increased viral invasion into host

68 cells, and a high transmission rate associated with this VOC<sup>9</sup>. The disease caused by infection  
69 with the Omicron variant is considered to be less severe than that caused by previous variants<sup>10-</sup>  
70 <sup>12</sup>, but the high transmissibility and infectivity of this variant may pose an additional threat to  
71 global health security. Several antiviral treatment options for patients with COVID-19 at risk of  
72 severe disease, including molnupiravir<sup>13</sup>, nirmatrelvir in combination with a pharmacokinetic  
73 booster ritonavir<sup>14</sup>, sotrovimab<sup>15</sup>, and casirivimab/imdevimab<sup>16</sup>, have demonstrated efficacy in  
74 reducing the risk of hospitalization, death, or disease progression. However, in view of the public  
75 burden of the transmission of infectious viruses and disease characteristics of COVID-19, as well  
76 as to draw maximum benefits from early pharmacological treatment initiation  
77 ([https://www.kansensho.or.jp/uploads/files/topics/2019ncov/covid19\\_drug\\_220218.pdf](https://www.kansensho.or.jp/uploads/files/topics/2019ncov/covid19_drug_220218.pdf); website  
78 in Japanese), additional oral antiviral agents that can be administered to patients with  
79 mild-to-moderate COVID-19 regardless of the risk of severe disease are needed.

80         Ensitrelvir fumaric acid (S-217622; hereafter, ensitrelvir), a novel oral SARS-CoV-2  
81 3C-like protease inhibitor, was discovered through joint research by Hokkaido University and  
82 Shionogi & Co., Ltd<sup>17</sup>. Ensitrelvir has shown antiviral efficacy in both *in vitro* and *in vivo* animal  
83 studies against different SARS-CoV-2 variants, including the Omicron variant<sup>17-19</sup>. Additionally,  
84 in a phase 1 study of ensitrelvir (Japan Registry of Clinical Trials identifier: jRCT2031210202),  
85 the once-daily oral dose was well tolerated and demonstrated a favorable pharmacokinetic profile  
86 (R. Shimizu, et al., unpublished data). A multicenter, randomized, double-blind,  
87 placebo-controlled, phase 2/3 study is also underway to assess the efficacy, safety, and  
88 pharmacokinetics of ensitrelvir administered as a 5-day oral regimen. In its phase 2a part,  
89 although the sample size was small, ensitrelvir treatment led to a reduction in the SARS-CoV-2  
90 viral titer and viral RNA versus placebo with an acceptable safety profile<sup>20</sup>. Herein, we present

91 the antiviral and clinical efficacy and safety of ensitrelvir derived from the phase 2b part of this  
92 phase 2/3 study.

93

## 94 **Results**

### 95 **Patient disposition**

96 This phase 2b, dose-finding part of the study (Japan Registry of Clinical Trials identifier:  
97 jRCT2031210350) was conducted from January 2 to February 9, 2022, at 87 institutions in Japan  
98 and South Korea (Supplementary Table 1). Of the 437 patients who provided informed consent,  
99 9 were excluded prior to randomization due to screening failure. Among the 428 patients in total,  
100 142, 143, and 143 were randomized to receive ensitrelvir 125 mg (375 mg on day 1), ensitrelvir  
101 250 mg (750 mg on day 1), or placebo, respectively, until day 5; 140, 140, and 141 patients,  
102 respectively, were included in the safety analysis population. A total of 134, 136, and 139  
103 patients in the ensitrelvir 125 mg, ensitrelvir 250 mg, and placebo groups, respectively,  
104 completed the study. After the exclusion of patients with undetectable SARS-CoV-2 titer at  
105 baseline or those who provided incomplete informed consent (ensitrelvir 125 mg, 28; ensitrelvir  
106 250 mg, 27; and placebo, 32; some patients were excluded from the analysis populations due to  
107 more than one reason), 341 patients (ensitrelvir 125 mg, 114; ensitrelvir 250 mg, 116; and  
108 placebo, 111) were included in the intention-to-treat (ITT) population (Fig. 1). All analyses were  
109 performed in the planned treatment groups. The ITT population was used for all efficacy  
110 analyses, and the safety analysis population was used for all safety analyses.

### 111 **Demographics and clinical characteristics**

112 The baseline demographics and clinical characteristics of the ITT population are summarized in  
113 Table 1. No notable difference was observed in the baseline characteristics across the treatment

114 groups; the mean age was 35.6, 35.3, and 37.3 years, and 1 (0.9%), 2 (1.7%), and 1 (0.9%)  
115 patients were aged >65 years in the ensitrelvir 125 mg, ensitrelvir 250 mg, and placebo groups,  
116 respectively. A total of 61 (53.5%), 66 (56.9%), and 72 (64.9%) patients in the ensitrelvir  
117 125 mg, ensitrelvir 250 mg, and placebo groups, respectively, were male. Nearly half (ensitrelvir  
118 125 mg, 55 [48.2%]; ensitrelvir 250 mg, 53 [45.7%]; and placebo, 54 [48.6%]) of the patients  
119 were randomized within 72 hours of COVID-19 symptom onset, and >80% had received at least  
120 1 dose of mRNA SARS-CoV-2 vaccine (ensitrelvir 125 mg, 97 [85.1%]; ensitrelvir 250 mg,  
121 97 [83.6%]; and placebo, 97 [87.4%]). Among the predefined 12 COVID-19 symptoms  
122 (Supplementary Table 2), sore throat (ensitrelvir 125 mg, 65 [57.0%]; ensitrelvir 250 mg,  
123 63 [54.3%]; and placebo, 54 [48.6%]) and cough (ensitrelvir 125 mg, 48 [42.1%]; ensitrelvir  
124 250 mg, 46 [39.7%]; and placebo, 49 [44.1%]) were most frequently observed in all treatment  
125 groups.

## 126 **Treatment compliance**

127 The treatment compliance rate in the safety population was high across the treatment groups  
128 (mean value: ensitrelvir 125 mg, 97.9%; ensitrelvir 250 mg, 99.3%; and placebo, 99.3%).

## 129 **Co-primary efficacy endpoint: SARS-CoV-2 viral titer**

130 The mean SARS-CoV-2 viral titer, measured as  $\log_{10}$  50% tissue-culture infectious dose  
131 ( $[\text{TCID}_{50}]/\text{mL}$ ), was comparable across groups at baseline (2.5–2.8  $\log_{10}$   $\text{TCID}_{50}/\text{mL}$ ). In all  
132 treatment groups, the SARS-CoV-2 viral titer decreased with time for up to day 4 (after the third  
133 drug administration) and remained stable at the levels of lower limit of detection  
134 (1.1  $\log_{10}$   $\text{TCID}_{50}/\text{mL}$ ) until day 21 (Fig. 2a,b). The change from baseline in the SARS-CoV-2  
135 viral titer ( $\log_{10}$   $\text{TCID}_{50}/\text{mL}$ ) on day 4, assessed using analysis of covariance (ANCOVA), was  
136 significantly greater with ensitrelvir 125 mg and 250 mg (least-square [LS] mean [standard error

137 (SE)], -1.49 [0.04]; difference from placebo, -0.41 [95% confidence interval (CI), -0.51 to -0.31];  
138  $P < 0.0001$ ) versus placebo (LS mean [SE], -1.08 [0.04]). The change from baseline in the  
139 SARS-CoV-2 viral titer on day 4 was significantly greater with ensitrelvir 125 mg and 250 mg  
140 versus placebo irrespective of COVID-19 vaccination history or time from COVID-19 onset to  
141 randomization (Supplementary Table 3).

#### 142 **Co-primary efficacy endpoint: Total scores for 12 COVID-19 symptoms**

143 The mean total score of the predefined 12 COVID-19 symptoms showed a decreasing trend with  
144 time after treatment initiation in all groups (Extended Data Fig. 1). There was no significant  
145 difference in the time-weighted average change from baseline up to 120 hours in the total score  
146 of the 12 COVID-19 symptoms between the ensitrelvir 125 mg or 250 mg group and the placebo  
147 group (Table 2).

#### 148 **SARS-CoV-2 viral RNA level**

149 The SARS-CoV-2 RNA level decreased with time in all groups (Fig. 2c,d). The change from  
150 baseline in SARS-CoV-2 RNA level ( $\log_{10}$  copies/mL) on day 4, assessed using ANCOVA, was  
151 significantly greater with ensitrelvir 125 mg (LS mean [SE], -2.58 [0.11]; difference from  
152 placebo, -1.30 [95% CI, -1.57 to -1.03];  $P < 0.0001$ ) and 250 mg (LS mean [SE], -2.49 [0.11];  
153 difference from placebo, -1.21 [95% CI, -1.48 to -0.94];  $P < 0.0001$ ) versus placebo (LS mean  
154 [SE], -1.28 [0.11]). Similarly, the change from baseline in SARS-CoV-2 RNA level was  
155 significantly greater in the ensitrelvir groups versus the placebo group on days 2, 6, and 9.

#### 156 **Time to first negative SARS-CoV-2 viral titer**

157 The time to first negative SARS-CoV-2 viral titer (infectious viral clearance) was significantly  
158 shorter with ensitrelvir 125 mg (51.3 hours; difference of median time from placebo, -40.6 hours;



159  $P<0.0001$ ) and 250 mg (62.1 hours; difference of median time from placebo, -29.8 hours;  
160  $P<0.0001$ ) versus placebo (91.9 hours) (Fig. 3).

### 161 **Proportion of patients with a positive SARS-CoV-2 viral titer**

162 The proportion of patients with a positive SARS-CoV-2 viral titer decreased with time in all  
163 treatment groups; on day 4, it was significantly lower with ensitrelvir 125 mg (1.9%,  $P<0.0001$ )  
164 and 250 mg (5.4%,  $P<0.0001$ ) versus placebo (50.0%), with a reduction of approximately 90%.  
165 Similarly, the proportion of patients with a positive SARS-CoV-2 viral titer was significantly  
166 lower with ensitrelvir 125 mg and 250 mg versus placebo on day 6 (Extended Data Fig. 2).

### 167 **Subtotal scores for the 12 COVID-19 symptoms**

168 The mean changes from baseline in the subtotal scores of the 12 COVID-19 symptoms are  
169 depicted in Extended Data Fig. 3. In addition to the preplanned subtotal scores (acute symptoms,  
170 main clinical symptoms, respiratory symptoms, systemic symptoms, and digestive symptoms), a  
171 composite subtotal score of respiratory symptoms and feverishness was evaluated as a post hoc  
172 analysis. The time-weighted average change from baseline up to 120 hours was significantly  
173 greater with ensitrelvir versus placebo in the subtotal scores for acute symptoms (250 mg group,  
174  $P=0.0070$ ), main clinical symptoms (250 mg group,  $P=0.0149$ ), respiratory symptoms (125 mg  
175 and 250 mg groups,  $P=0.0153$  and 0.0033, respectively), and the composite of respiratory  
176 symptoms and feverishness (125 mg and 250 mg groups,  $P=0.0164$  and 0.0039, respectively). In  
177 contrast, no significant difference was observed between the ensitrelvir and placebo groups in the  
178 time-weighted average change for systemic symptoms and digestive symptoms (Supplementary  
179 Table 4). The anosmia and dysgeusia scores generally showed a transient increase from baseline,  
180 suggesting a delayed onset of these symptoms in patients with COVID-19. The change from

181 baseline in the anosmia and dysgeusia scores was lower with ensitrelvir 125 mg and 250 mg  
182 versus placebo (Extended Data Fig. 4).

183 No significant difference was observed in the time to first improvement of COVID-19  
184 symptoms (median [95% CI] hours: 28.0 [21.5 to 36.6], 27.8 [24.6 to 40.0], and 36.6 [28.0 to  
185 40.8] for ensitrelvir 125 mg, ensitrelvir 250 mg, and placebo, respectively).

### 186 **COVID-19 exacerbation**

187 After treatment initiation, 1 vaccinated patient in the ensitrelvir 250 mg group was rated as  $\geq 3$   
188 (corresponding to hospitalization or death) by the investigator on an 8-point ordinal scale for  
189 disease exacerbation. None of the patients in the ensitrelvir 125 mg and placebo groups recorded  
190  $\geq 3$  on the disease exacerbation scale.

### 191 **Safety**

192 Overall, 48 (34.3%), 60 (42.9%), and 44 (31.2%) patients in the ensitrelvir 125 mg, ensitrelvir  
193 250 mg, and placebo groups, respectively, reported treatment-emergent adverse events (TEAEs),  
194 most of which were mild in severity. Treatment-related adverse events (AEs) were observed in  
195 19 (13.6%), 31 (22.1%), and 7 (5.0%) patients in the ensitrelvir 125 mg, ensitrelvir 250 mg, and  
196 placebo groups, respectively, a majority of which were resolved without sequelae. A decrease in  
197 high-density lipoprotein (HDL) levels was most frequently reported as a TEAE across groups  
198 (ensitrelvir 125 mg, 31 [22.1%] patients; ensitrelvir 250 mg, 40 [28.6%] patients; and placebo, 5  
199 [3.5%] patients) and was the most common treatment-related AE in both ensitrelvir groups  
200 (125 mg, 13 [9.3%] patients; 250 mg, 22 [15.7%] patients). No TEAEs leading to death were  
201 reported during the study (Table 3).

202 Two patients in the placebo group had serious TEAEs (thoracic vertebral fracture  
203 [recovered without sequelae] and facial paralysis [recovering]), both of which were determined

204 as not treatment related. Another 2 patients in the ensitrelvir 125 mg group discontinued the  
205 treatment due to TEAEs. All 3 TEAEs leading to treatment discontinuation (mild eczema on day  
206 2 in 1 patient and moderate nausea and mild headache on day 2 in 1 patient) were judged as  
207 treatment related by the investigator, and both patients recovered without sequelae after drug  
208 discontinuation.

209 A dose-dependent, transient change in the HDL cholesterol, triglyceride, total bilirubin,  
210 and iron levels was observed on day 6 in the ensitrelvir groups (Extended Data Fig. 5). These  
211 changes were asymptomatic and resolved without additional treatment.

212 No notable difference was observed with ensitrelvir treatment versus placebo in the  
213 haptoglobin, reticulocyte, or low-density lipoprotein levels, and no laboratory or clinical signs of  
214 hemolysis were observed. None of the patients showed serum bilirubin increase occurring  
215 concurrently with liver enzyme elevation.

216

## 217 **Discussion**

218 This phase 2b part of a randomized, double-blind, placebo-controlled, phase 2/3 trial of  
219 ensitrelvir in patients with mild-to-moderate COVID-19 was conducted in early 2022 during the  
220 SARS-CoV-2 Omicron epidemic. Based on the results of the phase 2a part conducted during the  
221 SARS-CoV-2 Delta epidemic<sup>20</sup>, which showed a statistically significant reduction in the  
222 SARS-CoV-2 viral titer and an improving trend in the total score of the 12 COVID-19 symptoms  
223 after ensitrelvir treatment, we used these outcomes as the co-primary endpoints. On day 4,  
224 ensitrelvir treatment significantly reduced the SARS-CoV-2 viral titer versus placebo. There was  
225 no significant difference from placebo in the time-weighted average change from baseline up to  
226 120 hours in the total score of the 12 COVID-19 symptoms. Of note, because of the difference in

227 the predominant SARS-CoV-2 variants, virologic characteristics and clinical disease course  
228 observed in this phase 2b part may not be consistent with those observed in the phase 2a part or  
229 previous anti-COVID-19 clinical trials and may affect the interpretation of the virologic and  
230 clinical efficacy of ensitrelvir.

231 In the current phase 2b part, virologic efficacy was assessed using the change in  
232 SARS-CoV-2 viral titer from baseline to day 4 (co-primary endpoint) and SARS-CoV-2 RNA  
233 (endpoint commonly used in clinical studies for anti-COVID-19 treatments<sup>14,16,21</sup>). The rapid and  
234 significant reduction in the SARS-CoV-2 viral titer and viral RNA following ensitrelvir  
235 treatment is consistent with the findings of the previous phase 2a part<sup>20</sup>, but the level of viral titer  
236 reduction from baseline to day 4 was lower in the current phase 2b part ( $-1.49 \log_{10} \text{TCID}_{50}/\text{mL}$ )  
237 than in the phase 2a part ( $-2.81 \log_{10} \text{TCID}_{50}/\text{mL}$  with ensitrelvir 250 mg)<sup>20</sup>. These differences in  
238 findings may be attributed to the lower baseline titer recorded in the phase 2b part than in the  
239 phase 2a part (2.5–2.8 versus 3.3–3.7  $\log_{10} \text{TCID}_{50}/\text{mL}$ ), as well as other unidentified differences  
240 in viral characteristics. Indeed, previous research findings indicate different characteristics  
241 between the Omicron and Delta variants in the infectivity or peak viral titer measured in Vero-E6  
242 cells<sup>22</sup> and peak viral load and viral clearance<sup>23</sup>, despite the consistent antiviral efficacy of  
243 ensitrelvir against the Omicron variant shown in preclinical research<sup>17-19</sup>. The difference from  
244 placebo in the reduction in SARS-CoV-2 RNA observed from baseline to day 4 in the current  
245 phase 2b part ( $-1.30$  and  $-1.21 \log_{10} \text{copies}/\text{mL}$  for ensitrelvir 125 and 250 mg, respectively)  
246 appeared greater than that observed with molnupiravir 800 mg (day 5,  $-0.547 \log_{10} \text{copies}/\text{mL}$ )<sup>21</sup>,  
247 nirmatrelvir 300 mg in combination with ritonavir 100 mg (day 5,  $-0.868 \log_{10} \text{copies}/\text{mL}$ )<sup>14</sup>, or  
248 casirivimab/imdevimab 2400 mg (day 7,  $-0.86 \log_{10} \text{copies}/\text{mL}$ )<sup>16</sup>. The majority of patients  
249 enrolled in the current phase 2b part were vaccinated, whereas previous anti-COVID-19

250 treatments were evaluated in unvaccinated patients at risk of severe disease<sup>13,14</sup>. Although no  
251 direct comparison with previous clinical trials is feasible due to differences in study settings, our  
252 results support the promising efficacy of ensitrelvir in real-world clinical settings. Moreover, no  
253 notable viral rebound (increase in viral titer or RNA) was observed on day 14 or 21 of ensitrelvir  
254 treatment in contrast to the findings observed with nirmatrelvir treatment  
255 (<https://www.fda.gov/media/155194/download>). The absence of viral rebound may be attributed  
256 to a longer half-life of ensitrelvir (51.4 hours; R. Shimizu et al., unpublished data) versus  
257 nirmatrelvir 250 mg in combination with ritonavir 100 mg (approximately 6.5 hours)<sup>24</sup>, which  
258 should be further assessed in large-scale, confirmatory trials.

259 Clinical efficacy, such as a symptom relief, is a pivotal part of COVID-19 clinical trials  
260 because patients present with diverse symptoms<sup>25</sup> and clinical symptoms may differ depending  
261 on the epidemic variants. Although the decreasing trend in the total 12 COVID-19 symptom  
262 scores is consistent with the findings from the phase 2a part<sup>20</sup>, the results of the current phase 2b  
263 part indicate differences in the symptom characteristics between the Omicron and Delta variant  
264 infections. Among the 12 symptoms assessed, respiratory symptoms and feverishness were  
265 recorded in many patients enrolled in the phase 2b part, whereas systemic and digestive  
266 symptoms were relatively less observed at baseline. These findings can be explained by an  
267 epidemiology report in Japan, where the most commonly reported COVID-19 symptoms in  
268 patients infected with the Omicron variant were respiratory symptoms, such as cough (46.0%),  
269 sore throat (33.8%), runny nose (18.0%), and fever (30.9%) ([https://www.niid.go.jp/niid/ja/2019-  
270 ncov/2484-idsc/10969-covid19-72.html](https://www.niid.go.jp/niid/ja/2019-ncov/2484-idsc/10969-covid19-72.html); website in Japanese). The absence of significant  
271 intergroup difference in the total score of the 12 COVID-19 symptoms can be attributed to the  
272 low baseline subtotal scores recorded for some patients (e.g., digestive symptoms) in the current

273 phase 2b part. Interestingly, ensitrelvir treatment improved respiratory symptoms or a composite  
274 outcome of respiratory symptoms and feverishness versus placebo, which suggests the potential  
275 clinical benefits of this antiviral in patients infected with the Omicron variant.

276 The current phase 2b part of the study found no clear dose response, which is consistent  
277 with the findings of the phase 2a part<sup>20</sup>. Pharmacokinetic data for 5-day ensitrelvir 125 mg  
278 treatment (375 mg on day 1) derived from the phase 1 study of ensitrelvir (maximum plasma  
279 concentration, 30.4 µg/mL; area under the curve, 598.3 µg·hr/mL) suggest that this regimen is  
280 sufficient to achieve a reduction in SARS-CoV-2 in humans (R. Shimizu et al., unpublished  
281 data). Ensitrelvir 125 mg (375 mg on day 1) is thus considered the optimal dose for achieving an  
282 antiviral effect while minimizing drug exposure.

283 Infection with the Omicron variant causes less severe disease than infection with the  
284 Delta variant<sup>26-28</sup>, which may be attributed to altered infectivity and attenuated lung disease with  
285 the Omicron variant observed in rodent models<sup>29</sup> or immunity acquired via previous viral  
286 exposure through vaccination and/or past infections<sup>27,28</sup>. In the current phase 2b part, >95% of  
287 patients receiving placebo showed symptom improvement by day 5, and the median time to first  
288 improvement of the 12 COVID-19 symptoms (27.8–36.6 hours) was shorter than that observed  
289 in the previous phase 2a part (36.7–55.2 hours), which may reflect less disease severity of  
290 infection with the Omicron variant. New clinical endpoints that can assess the clinical symptoms  
291 of COVID-19 are warranted.

292 In addition to treatment options for patients at risk of severe disease, effective antivirals  
293 that can rapidly reduce SARS-CoV-2 are warranted because patients with asymptomatic or  
294 mild-to-moderate COVID-19 may shed infectious viruses for up to 10 days and may be a source  
295 for viral transmission<sup>30</sup>. Early treatment initiation for mild-to-moderate COVID-19 is necessary

296 in view of the disease characteristics and to gain maximum benefits from pharmacological  
297 therapies  
298 ([https://www.kansensho.or.jp/uploads/files/topics/2019ncov/covid19\\_drug\\_220218.pdf](https://www.kansensho.or.jp/uploads/files/topics/2019ncov/covid19_drug_220218.pdf); website  
299 in Japanese). Moreover, long-term complications after COVID-19, such as loss of taste and/or  
300 smell, fatigue, headache, attention disorder, hair loss, and dyspnea, can occur in the relatively  
301 healthy population (e.g., young adults or patients with mild disease) and contribute toward  
302 persistent and significant health issues<sup>31,32</sup>. Although the exact mechanism of the onset of  
303 long-term COVID-19 complications is unknown, rapid SARS-CoV-2 reduction with ensitrelvir  
304 treatment may be effective in suppressing these complications, which should be assessed in an  
305 optional, exploratory period (days 28 to 337) of the current phase 2/3 study.

306         Similar to the previous phase 1 study (R. Shimizu et al., unpublished data) and phase 2a  
307 part of the current study<sup>20</sup>, a transient change in the HDL cholesterol and triglyceride levels was  
308 observed in patients treated with ensitrelvir. In addition, total bilirubin and iron levels transiently  
309 increased with ensitrelvir treatment. The underlying causes of these laboratory findings and their  
310 potential relationship with ensitrelvir treatment warrant further investigation.

311         This study has some limitations. The number of elderly patients (aged  $\geq 65$  years) was  
312 limited; thus, data analysis for this population was not feasible. As the risk of severe COVID-19  
313 increases with age<sup>33</sup>, the safety and efficacy of ensitrelvir in a wide range of patients with  
314 COVID-19 should be further assessed in the phase 3, multinational, randomized, placebo-  
315 controlled study, SCORPIO-HR (ClinicalTrials.gov identifier: NCT05305547). Moreover, as  
316 new variants may arise in the future, continuous monitoring and assessment of ensitrelvir activity  
317 against new VOCs would be required. In addition to the preclinical antiviral activity of

318 ensitrelvir against a variety of SARS-CoV-2 variants<sup>17</sup>, evidence derived in clinical trial settings  
319 is awaited.

320 In conclusion, 5-day, once daily, oral ensitrelvir treatment demonstrated rapid and  
321 favorable antiviral efficacy with an acceptable safety profile in patients with mild-to-moderate  
322 COVID-19, a majority of whom had been vaccinated. Ensitrelvir treatment improved respiratory  
323 symptoms and feverishness, which were common COVID-19 symptoms during the Omicron  
324 variant epidemic. The results support further clinical development of ensitrelvir for mild-to-  
325 moderate COVID-19.

326

## 327 **Methods**

### 328 **Study design**

329 Patients with mild-to-moderate COVID-19 were randomized (1:1:1) to orally receive ensitrelvir  
330 fumaric acid (375 mg on day 1, followed by 125 mg on days 2 through 5, or 750 mg on day 1,  
331 followed by 250 mg on days 2 through 5) or matching placebo once daily without dose  
332 modification and followed up until day 28.

333 This study was conducted in accordance with the principles of the Declaration of  
334 Helsinki, Good Clinical Practice guidelines, and other applicable laws and regulations. The study  
335 was reviewed and approved by the institutional review boards of all participating institutions  
336 listed in Supplementary Table 1. All patients or their legally acceptable representatives provided  
337 written informed consent.

### 338 **Patients**

339 Patients aged 12 to 69 years who tested positive for SARS-CoV-2 (assessed by SARS-CoV-2  
340 antigen or nucleic acid detection testing) within 120 hours prior to randomization were eligible



341 for study enrollment. To avoid excess drug exposure, patients aged <20 years should have  
342 recorded a body weight of  $\geq 40$  kg at enrollment. Patients should have at least one moderate or  
343 severe symptom or worsening of an existing symptom among the 12 COVID-19 symptoms  
344 (stuffy or runny nose, sore throat, shortness of breath, cough, low energy or tiredness, muscle or  
345 body aches, headache, chills or shivering, feeling hot or feverish, nausea, vomiting, or diarrhea;  
346 Supplementary Table 2) based on the US Food and Drug Administration (US FDA) guidance  
347 ([https://www.fda.gov/regulatory-information/search-fda-guidance-documents/assessing-covid-](https://www.fda.gov/regulatory-information/search-fda-guidance-documents/assessing-covid-19-related-symptoms-outpatient-adult-and-adolescent-subjects-clinical-trials-drugs)  
348 [19-related-symptoms-outpatient-adult-and-adolescent-subjects-clinical-trials-drugs](https://www.fda.gov/regulatory-information/search-fda-guidance-documents/assessing-covid-19-related-symptoms-outpatient-adult-and-adolescent-subjects-clinical-trials-drugs)) and a  
349 symptom duration of  $\leq 120$  hours. In Japan, patients were eligible for enrollment irrespective of  
350 treatment settings (inpatient, outpatient, recuperation at home, or recuperation at designated  
351 hotels) because some of them required hospitalization or recuperation for the purpose of isolation  
352 or clinical trial participation, regardless of disease severity, at the time of this research.

353 The key exclusion criteria included the following: an awake oxygen saturation of  $\leq 93\%$   
354 (room air); oxygen administration; likely worsening of COVID-19 within 48 hours from  
355 randomization in the opinion of the investigator; suspected active and systemic infections  
356 requiring treatment (except for COVID-19); current or chronic history of moderate or severe  
357 liver disease, known hepatic or biliary abnormalities (except for Gilbert's syndrome or  
358 asymptomatic gallstones), or moderate-to-severe kidney disease; pregnant, possibly pregnant, or  
359 breastfeeding women; and blood donation ( $\geq 400$  mL within 12 weeks or  $\geq 200$  mL within  
360 4 weeks prior to enrollment). Patients who had used drugs for SARS-CoV-2 infection within  
361 7 days prior to randomization or a strong cytochrome P450, family 3, subfamily A (CYP3A)  
362 inhibitor or inducer or St. John's wort products within 14 days prior to randomization were also  
363 excluded.

364 **Randomization and blinding**

365 Randomization of patients was performed through an interactive response technology system  
366 using time from the onset of COVID-19 to randomization (<72 hours/≥72 hours) and the first  
367 COVID-19 vaccination (Yes/No) as stratification factors. All patients and study staff were  
368 blinded to the treatment, except for designated persons at the sponsor and contract research  
369 organization in charge of statistical analyses. When all patients completed the day 6 assessment,  
370 the study sponsor was unblinded to intervention allocation to allow for an early-stage evaluation  
371 of the efficacy and safety data. Investigators, patients, and other study staff remained blinded  
372 until the completion of the 28-day follow-up period. Emergency unblinding per the investigator's  
373 request was allowed only in the event of AEs to determine appropriate therapy for the patient.

374 **Treatment**

375 Patients received allocated study drugs orally (ensitrelvir fumaric acid 125 mg, 250 mg, or  
376 placebo tablets), which were indistinguishable in appearance, labeling, and packaging. Prohibited  
377 concomitant medications (study initiation to day 28 or study discontinuation) included drugs for  
378 the treatment of SARS-CoV-2 infection; antiviral, antibacterial, or antifungal drugs (except for  
379 topical use); antipyretic analgesics other than acetaminophen; antitussives and expectorants;  
380 combination cold remedy; and CYP3A substrates. Drugs prohibited for use from study initiation  
381 to 10 days after the last study drug administration (or study discontinuation) included strong  
382 CYP3A inhibitors or inducers, strong P-glycoprotein or breast cancer resistance protein  
383 inhibitors, and other transporter substrates. Treatment was discontinued when liver function  
384 abnormalities, pregnancy, COVID-19 exacerbation, or serious or intolerable AEs were observed.

385 **Outcomes and assessments**

386 The primary virologic outcome was change from baseline (day 1, before drug administration) in  
387 the SARS-CoV-2 viral titer on day 4 of treatment. The primary clinical outcome was  
388 time-weighted average change from baseline up to 120 hours in the total score of COVID-19  
389 symptoms. The co-primary endpoint was constructed by the primary virologic and clinical  
390 outcomes. The secondary outcomes included the SARS-CoV-2 viral titer and viral RNA level  
391 (absolute values and change from baseline) up to day 21, time to first negative SARS-CoV-2  
392 viral titer (infectious viral clearance), proportion of patients with positive viral titers, subtotal  
393 scores of the 12 COVID-19 symptoms (acute symptoms, main clinical symptoms, respiratory  
394 symptoms, systemic symptoms, and digestive symptoms; Supplementary Table 2), time to first  
395 improvement of COVID-19 symptoms (Supplementary Table 2), and COVID-19 exacerbations  
396 assessed by the investigator. Additionally, post hoc analyses were performed to assess a  
397 composite subtotal score (respiratory symptoms and feverishness) for the 12 COVID-19  
398 symptoms.

399 Nasopharyngeal swabs were collected from the patients on days 1 (before drug  
400 administration), 2 to 6 (days 3 and 5 as optional), 9, 14, and 21 (or study discontinuation), and  
401 the SARS-CoV-2 viral titers and RNA levels were centrally measured at Shionogi  
402 TechnoAdvance Research (Osaka, Japan) and Viroclinics (Rotterdam, Netherlands),  
403 respectively. For the assessment of COVID-19 symptoms, patients rated each symptom on a  
404 4-point or 3-point scale (Supplementary Table 2) and recorded the scores in a diary twice daily  
405 (morning and evening) until day 9 and once daily (evening) from days 10 to 21. Additionally,  
406 patients' COVID-19 exacerbation was assessed by the investigator using an 8-point ordinal scale  
407 (0=Asymptomatic; 1=Symptomatic, no limitation of activities; 2=Symptomatic, limitation of  
408 activities; 3=Hospitalized, no oxygen therapy; 4=Hospitalized, with oxygen therapy [ $<5$  L/min];

409 5=Hospitalized, with oxygen therapy [ $\geq 5$  L/min]; 6=Hospitalized, with ventilation; 7=Death) on  
410 day 1 (before drug administration) and days 2, 4, 6, 9, 14, 21, and 28 (or study discontinuation).

411 Safety was assessed by the occurrence of TEAEs, that is, any AEs reported after the  
412 initiation of study intervention. All AEs were coded and classified using Medical Dictionary for  
413 Regulatory Activities version 24.0. Laboratory tests, vital sign measurements, and  
414 electrocardiography were additionally performed throughout the study period. All safety data  
415 were evaluated by an independent data and safety monitoring board. Pregnancy tests were  
416 performed for women with childbearing potential on days 1 (before drug administration) and 28  
417 (or study discontinuation). Additional pregnancy tests at the investigator's discretion were  
418 permitted.

#### 419 **Statistical analyses**

420 Based on the interim evaluation of the phase 2a part of this study (Shionogi & Co., Ltd.,  
421 unpublished data), the difference in time-weighted average change in the total score of  
422 COVID-19 symptoms from baseline up to 120 hours between the ensitrelvir and placebo groups  
423 was assumed to be -1, with a standard deviation (SD) of 2.6. A total of 108 patients per group  
424 (324 in total) were required to detect this difference with 80% power using a two-sample t-test at  
425 a one-sided significance level of 0.025. The same sample size was required to detect the  
426 intergroup difference in change from baseline in the SARS-CoV-2 viral titer on day 4 with  
427 99.9% power using a two-sample t-test at a one-sided significance level of 0.025, assuming a  
428 difference between the ensitrelvir and placebo groups of  $-0.5 \log_{10}$  TCID<sub>50</sub>/mL and an SD of  
429  $0.7 \log_{10}$  TCID<sub>50</sub>/mL. Considering a dropout rate of 25% (proportion of patients with a negative  
430 SARS-CoV-2 viral titer at baseline), the final sample size was set at 145 patients per group (435  
431 in total).

432 All randomized patients with a positive SARS-CoV-2 viral titer ( $\geq 1.1 \log_{10}$  TCID<sub>50</sub>/mL)  
433 at baseline were included in the ITT population. All randomized patients who received at least  
434 one dose of the study drug were included in the safety analysis population.

435 A prespecified statistical hypothesis was set, wherein both virologic and clinical  
436 efficacy are confirmed if differences in the co-primary endpoints of virologic and clinical  
437 outcomes between the ensitrelvir (125 mg or 250 mg) and placebo groups are statistically  
438 significant at a one-sided significance level of 0.025. To control the type I error for multiplicity  
439 of testing that occurred in pairwise comparisons between each of the ensitrelvir dose groups and  
440 the placebo group, a fixed sequence procedure was applied to the primary virologic and clinical  
441 outcomes, where the statistical tests were performed in the order of ensitrelvir 125 mg versus  
442 placebo and ensitrelvir 250 mg versus placebo. Other statistical tests were performed at a  
443 two-sided significance level of 0.05.

444 An ANCOVA model was constructed for the primary analysis of the primary endpoints  
445 for pairwise comparison of each efficacy outcome between each of the ensitrelvir groups and the  
446 placebo group using baseline values, time from COVID-19 onset to randomization (<72 or  
447  $\geq 72$  hours), and COVID-19 vaccination history (Yes or No) as covariates. LS mean, difference  
448 from placebo, and 95% CI were calculated based on the ANCOVA model. Time-weighted  
449 average change from baseline up to 120 hours in the total score of the 12 COVID-19 symptoms  
450 was calculated by dividing the area under the curve up to 120 hours for change from baseline in  
451 the total score of the 12 COVID-19 symptoms by hours from the start of first drug  
452 administration. A Kaplan-Meier curve was plotted for the analyses of time to first negative  
453 SARS-CoV-2 viral titer and time to first improvement of COVID-19 symptoms, and the median  
454 time was compared between each of the ensitrelvir groups and the placebo group using a

455 log-rank test stratified by time from COVID-19 onset to randomization and COVID-19  
456 vaccination history. The proportion of patients with a positive SARS-CoV-2 viral titer was  
457 compared between each of the ensitrelvir groups and the placebo group using the  
458 Mantel-Haenszel test, stratified by time from COVID-19 onset to randomization and  
459 SARS-CoV-2 vaccination history.

460 No imputation was performed for missing data. All analyses were performed using SAS  
461 version 9.4 (SAS Institute, Inc., Cary, NC, USA).

462

### 463 **Data availability**

464 Shionogi & Co., Ltd. is committed to disclosing the synopses and results of its clinical trials and  
465 sharing the clinical trial data with researchers on reasonable request. For further details, please  
466 refer to the websites of Shionogi & Co., Ltd.

467 (<https://www.shionogi.com/shionogi/global/en/company/policies/shionogi-group-clinical-trial->  
468 [data-transparency-policy.html](https://www.shionogi.com/shionogi/global/en/company/policies/shionogi-group-clinical-trial-data-transparency-policy.html)) and Vivli (<https://vivli.org/>).

469

### 470 **Acknowledgments**

471 The authors and research team thank all the patients involved in this study and Masahiro  
472 Kinoshita and Satoshi Kojima (Shionogi & Co., Ltd.) for preparing technical support documents  
473 and an earlier version of the manuscript draft. Support for study monitoring and data  
474 management was provided by EPS Corporation and funded by Shionogi & Co., Ltd. Medical  
475 writing and editorial assistance was provided by Mami Hirano, MS, of Cactus Life Sciences (part  
476 of Cactus Communications) and funded by Shionogi & Co., Ltd. All authors retained full  
477 ownership of the manuscript content and approved the final draft for submission.

478 This study was sponsored by Shionogi & Co., Ltd., and financially supported by the  
479 Organization of the Ministry of Health, Labour and Welfare. Employees of Shionogi & Co., Ltd.,  
480 participated in and approved the design and conduct of the study; wrote the protocol; and were  
481 involved in the collection, management, analysis, and interpretation of data. Institutional authors  
482 reviewed and approved the protocol and collected and interpreted the data.

483 H. Mukae has received funding relevant to the submitted work from Shionogi and grants  
484 from Taisho Pharma; lecture fees from Pfizer, MSD, Shionogi, and Taisho Pharma; and advisory  
485 fees from Pfizer, MSD, and Shionogi outside the submitted work. H. Yotsuyanagi has received  
486 consulting fees from Shionogi, lecture fees from Shionogi and ViiV Healthcare, and travel  
487 support from Shionogi outside the submitted work. He serves as an advisory board member of  
488 Shionogi and President of the Japanese Society of Infectious Diseases. Y. Doi has received  
489 grants from Shionogi and Entasis; consulting fees from Shionogi, Meiji Seika Pharma, Gilead  
490 Sciences, GSK, MSD, Chugai, and bioMerieux; and lecture fees from MSD, AstraZeneca,  
491 Shionogi, and Teijin Healthcare outside the submitted work and serves as an advisory board  
492 member of FujiFilm. H. Sakaguchi, T. Sonoyama, G. Ichihashi, T. Sanaki, K. Baba, Y. Tsuge,  
493 and T. Uehara are full-time employees of Shionogi & Co., Ltd., and may have stocks or stock  
494 options. N. Ohmagari declares no conflict of interest.

495 **Author contributions:** H. Mukae, H. Yotsuyanagi, N. Ohmagari, Y. Doi, T. Sonoyama, Y.  
496 Tsuge, and T. Uehara conceived and designed the experiments and wrote the paper. H.  
497 Sakaguchi conceived and designed the experiments, analyzed the data, contributed  
498 materials/analysis tools, and wrote the paper. G. Ichihashi conceived and designed the  
499 experiments and contributed materials/analysis tools. T. Sanaki conceived and designed the  
500 experiments, performed the experiments, analyzed the data, contributed materials/analysis tools,

501 and wrote the paper. K. Baba performed the experiments, analyzed the data, contributed  
502 materials/analysis tools, and wrote the paper.  
503



504 **References**

- 505 1 Baden, L. R. et al. Efficacy and safety of the mRNA-1273 SARS-CoV-2 vaccine. *N. Engl.*  
506 *J. Med.* 384, 403–416 (2021).
- 507 2 Polack, F. P. et al. Safety and efficacy of the BNT162b2 mRNA Covid-19 vaccine. *N.*  
508 *Engl. J. Med.* 383, 2603–2615 (2020).
- 509 3 Voysey, M. et al. Single-dose administration and the influence of the timing of the  
510 booster dose on immunogenicity and efficacy of ChAdOx1 nCoV-19 (AZD1222)  
511 vaccine: a pooled analysis of four randomised trials. *Lancet* 397, 881–891 (2021).
- 512 4 Heath, P. T. et al. Safety and efficacy of NVX-CoV2373 Covid-19 vaccine. *N. Engl. J.*  
513 *Med.* 385, 1172–1183 (2021).
- 514 5 Levin, E. G. et al. Waning immune humoral response to BNT162b2 Covid-19 vaccine  
515 over 6 months. *N. Engl. J. Med.* 385, e84 (2021).
- 516 6 Bergwerk, M. et al. Covid-19 breakthrough infections in vaccinated health care workers.  
517 *N. Engl. J. Med.* 385, 1474–1484 (2021).
- 518 7 Lambrou, A. S. et al. Genomic surveillance for SARS-CoV-2 variants: predominance of  
519 the Delta (B.1.617.2) and Omicron (B.1.1.529) variants - United States, June 2021-  
520 January 2022. *MMWR Morb. Mortal. Wkly. Rep.* 71, 206–211 (2022).
- 521 8 Ao, D. et al. SARS-CoV-2 Omicron variant: immune escape and vaccine development.  
522 *MedComm (2020)*. 3, e126 (2022).
- 523 9 Kumar, S. et al. Omicron and Delta variant of SARS-CoV-2: a comparative  
524 computational study of spike protein. *J. Med. Virol.* 94, 1641–1649 (2022).
- 525 10 Wolter, N. et al. Early assessment of the clinical severity of the SARS-CoV-2 omicron  
526 variant in South Africa: a data linkage study. *Lancet* 399, 437–446 (2022).

- 527 11 Auvigne, V. et al. Severe hospital events following symptomatic infection with Sars-  
528 CoV-2 Omicron and Delta variants in France, December 2021 – January 2022: a  
529 retrospective, population-based, matched cohort study. *eClinicalMedicine* doi:  
530 10.1016/j.eclinm.2022.101455 **Error! Hyperlink reference not valid.**(2022).
- 531 12 Nyberg, T. et al. Comparative analysis of the risks of hospitalisation and death associated  
532 with SARS-CoV-2 omicron (B.1.1.529) and delta (B.1.617.2) variants in England: a  
533 cohort study. *Lancet* 399, 1303–1312 (2022).
- 534 13 Jayk Bernal, A. et al. Molnupiravir for oral treatment of Covid-19 in nonhospitalized  
535 patients. *N. Engl. J. Med.* 386, 509–520 (2022).
- 536 14 Hammond, J. et al. Oral nirmatrelvir for high-risk, nonhospitalized adults with Covid-19.  
537 *N. Engl. J. Med.* 386, 1397–1408 (2022).
- 538 15 Gupta, A. et al. Early treatment for Covid-19 with SARS-CoV-2 neutralizing antibody  
539 sotrovimab. *N. Engl. J. Med.* 385, 1941–1950 (2021).
- 540 16 Weinreich, D. M. et al. REGEN-COV antibody combination and outcomes in outpatients  
541 with Covid-19. *N. Engl. J. Med.* 385, e81 (2021).
- 542 17 Unoh, Y. et al. Discovery of S-217622, a non-covalent oral SARS-CoV-2 3CL protease  
543 inhibitor clinical candidate for treating COVID-19. *J. Med. Chem.* doi:  
544 10.1021/acs.jmedchem.2c00117 (2022).
- 545 18 Uraki, R. et al. Characterization and antiviral susceptibility of SARS-CoV-2  
546 Omicron/BA.2. *Nature* doi: 10.1038/s41586-022-04856-1 (2022).
- 547 19 Sasaki, M., Tabata, K., Kishimoto, M., Itakura, Y., Kobayashi, H., Ariizumi, T., Uemura,  
548 K., Toba, S., Kusakabe, S., Maruyama, Y., Iida, S., Nakajima, N., Suzuki, T., Yoshida, S.,  
549 Nobori, H., Sanaki, T., Kato, T., Shishido, T., Hall, W. W., Orba, Y., Sato, A. & Sawa, H.

- 550 Oral administration of S-217622, a SARS-CoV-2 main protease inhibitor, decreases viral  
551 load and accelerates recovery from clinical aspects of COVID-19. Preprint at *bioRxiv*  
552 <https://www.biorxiv.org/content/10.1101/2022.02.14.480338v1.full> (2022).
- 553 20 Mukae, H., Yotsuyanagi, H., Ohmagari, N., Doi, Y., Imamura, T., Sonoyama, T.,  
554 Fukuhara, T., Ichihashi, G., Sanaki, T., Baba, K., Takeda, Y., Tsuge, Y. & Uehara, T. A  
555 randomized phase 2/3 study of ensitrelvir, a novel oral SARS-CoV-2 3C-like protease  
556 inhibitor, in Japanese patients with mild-to-moderate COVID-19 or asymptomatic SARS-  
557 CoV-2 infection: results of the phase 2a part. Preprint at *medRxiv*  
558 <https://www.medrxiv.org/content/10.1101/2022.05.17.22275027v1> (2022).
- 559 21 Fischer, W. A., 2nd et al. A phase 2a clinical trial of molnupiravir in patients with  
560 COVID-19 shows accelerated SARS-CoV-2 RNA clearance and elimination of infectious  
561 virus. *Sci. Transl. Med.* 14, eab17430 (2022).
- 562 22 Mautner, L. et al. Replication kinetics and infectivity of SARS-CoV-2 variants of  
563 concern in common cell culture models. *Viol. J.* 19, 76 (2022).
- 564 23 Hay, J. A., Kissler, S. M., Fauver, J. R., Mack, C., Tai, C. G., Samant, R. M., Connelly,  
565 S., Anderson, D. J., Khullar, G., MacKay, M., Patel, M., Kelly, S., Manhertz, A., Eiter, I.,  
566 Salgado, D., Baker, T., Howard, B., Dudley, J. T., Mason, C. E., Ho, D. D., Grubaugh, N.  
567 D. & Grad, Y. H. Viral dynamics and duration of PCR positivity of the SARS-CoV-2  
568 Omicron variant. Preprint at *medRxiv*  
569 <https://www.medrxiv.org/content/10.1101/2022.01.13.22269257v1> (2022).
- 570 24 Singh, R. S. P. et al. Innovative randomized phase I study and dosing regimen selection  
571 to accelerate and inform pivotal COVID-19 trial of nirmatrelvir. *Clin. Pharmacol. Ther.*  
572 doi: 10.1002/cpt.2603 (2022).

- 573 25 Rodebaugh, T. L. et al. Acute symptoms of mild to moderate COVID-19 are highly  
574 heterogeneous across individuals and over time. *Open Forum Infect. Dis.* 8, ofab090  
575 (2021).
- 576 26 Johnson, A. G. et al. COVID-19 incidence and death rates among unvaccinated and fully  
577 vaccinated adults with and without booster doses during periods of Delta and Omicron  
578 variant emergence - 25 U.S. jurisdictions, April 4-December 25, 2021. *MMWR Morb.*  
579 *Mortal. Wkly. Rep.* 71, 132–138 (2022).
- 580 27 Davies, M-A. et al. Outcomes of laboratory-confirmed SARS-CoV-2 infection in the  
581 Omicron-driven fourth wave compared with previous waves in the Western Cape  
582 Province, South Africa. *Trop. Med. Int. Health.* doi: 10.1111/tmi.13752 (2022).
- 583 28 Veneti, L. et al. Reduced risk of hospitalisation among reported COVID-19 cases  
584 infected with the SARS-CoV-2 Omicron BA.1 variant compared with the Delta variant,  
585 Norway, December 2021 to January 2022. *Euro. Surveill.* 27, 2200077 (2022).
- 586 29 Halfmann, P. J. et al. SARS-CoV-2 Omicron virus causes attenuated disease in mice and  
587 hamsters. *Nature* 603, 687–692 (2022).
- 588 30 Singanayagam, A. et al. Duration of infectiousness and correlation with RT-PCR cycle  
589 threshold values in cases of COVID-19, England, January to May 2020. *Euro. Surveill.*  
590 25, 2001483 (2020).
- 591 31 Blomberg, B. et al. Long COVID in a prospective cohort of home-isolated patients. *Nat.*  
592 *Med.* 27, 1607–1613 (2021).
- 593 32 Lopez-Leon, S. et al. More than 50 long-term effects of COVID-19: a systematic review  
594 and meta-analysis. *Sci. Rep.* 11, 16144 (2021).

595 33 Pennington, A. F. et al. Risk of clinical severity by age and race/ethnicity among adults  
596 hospitalized for COVID-19-United States, March-September 2020. *Open Forum Infect.*  
597 *Dis.* 8, ofaa638 (2020).

598 **FIGURE LEGENDS**

599 **Fig. 1: Patient disposition.**

600 Some patients were excluded from the analysis populations due to more than one reason.

601 AE, adverse event; ITT, intention-to-treat.

602

603 **Fig. 2: a, Absolute values and b, change from baseline in SARS-CoV-2 viral titer; c,**

604 **absolute values and d, change from baseline in SARS-CoV-2 RNA level (ITT**

605 **population).**

606 Data are presented as mean±SD. \* $P < 0.05$  versus placebo. Dotted lines indicate the lower

607 limit of detection for SARS-CoV-2 viral titer ( $1.1 \log_{10}$  TCID<sub>50</sub>/mL) and lower limit of

608 quantification for SARS-CoV-2 RNA level ( $2.08 \log_{10}$  copies/mL).

609 ITT, intention-to-treat; SARS-CoV-2, severe acute respiratory syndrome coronavirus 2; SD,

610 standard deviation; TCID<sub>50</sub>, 50% tissue-culture infectious dose.

611

612 **Fig. 3: Time to first negative SARS-CoV-2 viral titer (viral clearance; ITT population).**

613 CI, confidence interval; ITT, intention-to-treat; SARS-CoV-2, severe acute respiratory

614 syndrome coronavirus 2.

615 **Extended data**

616 **Extended Data Fig. 1 a, Mean absolute values and b, mean change from baseline in the**  
617 **total score of the 12 COVID-19 symptoms (ITT population).**

618 COVID-19, coronavirus disease 2019; ITT, intention-to-treat.

619

620 **Extended Data Fig. 2 Proportion of patients with a positive SARS-CoV-2 viral titer**  
621 **(ITT population).**

622 \* $P < 0.05$  versus placebo.

623 ITT, intention-to-treat; SARS-CoV-2, severe acute respiratory syndrome coronavirus 2.

624

625 **Extended Data Fig. 3 Mean change from baseline in subtotal scores of the 12 COVID-19**  
626 **symptoms for a, acute symptoms, b, main clinical symptoms, c, respiratory symptoms,**  
627 **d, systemic symptoms, e, digestive symptoms, and f, respiratory symptoms and**  
628 **feverishness (ITT population).**

629 COVID-19, coronavirus disease 2019; ITT, intention-to-treat.

630

631 **Extended Data Fig. 4 Mean change from baseline in anosmia and dysgeusia scores (ITT**  
632 **population).**

633 Avg, average; ITT, intention-to-treat.

634

635 **Extended Data Fig. 5 Levels of a, HDL cholesterol, b, triglycerides, c, total bilirubin,**  
636 **and d, iron (safety analysis population).**

637 Data are presented as mean $\pm$ SD.

638 Avg, average; HDL, high-density lipoprotein; SD, standard deviation.

**TABLES****Table 1 Baseline demographics and clinical characteristics (ITT population)**

| <b>Variables</b>                               | <b>Ensitrelvir 125 mg<br/>(N=114)</b> | <b>Ensitrelvir 250 mg<br/>(N=116)</b> | <b>Placebo<br/>(N=111)</b> |
|------------------------------------------------|---------------------------------------|---------------------------------------|----------------------------|
| Male sex, <i>n</i> (%)                         | 61 (53.5)                             | 66 (56.9)                             | 72 (64.9)                  |
| Age, years, mean (SD)                          | 35.6 (13.5)                           | 35.3 (13.1)                           | 37.3 (12.6)                |
| Age, <i>n</i> (%)                              |                                       |                                       |                            |
| ≥12 to <18 years                               | 4 (3.5)                               | 2 (1.7)                               | 2 (1.8)                    |
| ≥18 to <65 years                               | 109 (95.6)                            | 112 (96.6)                            | 108 (97.3)                 |
| ≥65 to <70 years                               | 1 (0.9)                               | 2 (1.7)                               | 1 (0.9)                    |
| Patient conditions, <i>n</i> (%) <sup>a</sup>  |                                       |                                       |                            |
| Hospitalized                                   | 29 (25.4)                             | 44 (37.9)                             | 33 (29.7)                  |
| Outpatient                                     | 49 (43.0)                             | 40 (34.5)                             | 48 (43.2)                  |
| Recuperation at home                           | 2 (1.8)                               | 1 (0.9)                               | 0 (0.0)                    |
| Recuperation at hotels                         | 34 (29.8)                             | 31 (26.7)                             | 30 (27.0)                  |
| Time from onset to randomization, <i>n</i> (%) |                                       |                                       |                            |
| <24 hours                                      | 11 (9.6)                              | 2 (1.7)                               | 5 (4.5)                    |



|                                               |           |           |           |
|-----------------------------------------------|-----------|-----------|-----------|
| ≥24 to <48 hours                              | 21 (18.4) | 21 (18.1) | 24 (21.6) |
| ≥48 to <72 hours                              | 23 (20.2) | 30 (25.9) | 25 (22.5) |
| ≥72 to <96 hours                              | 37 (32.5) | 38 (32.8) | 33 (29.7) |
| ≥96 to ≤120 hours                             | 22 (19.3) | 23 (19.8) | 24 (21.6) |
| >120 hours                                    | 0 (0.0)   | 2 (1.7)   | 0 (0.0)   |
| COVID-19 vaccination history, <i>n</i> (%)    | 97 (85.1) | 97 (83.6) | 97 (87.4) |
| Patients with COVID-19 symptoms, <i>n</i> (%) |           |           |           |
| Respiratory symptoms                          |           |           |           |
| Stuffy or runny nose                          | 29 (25.4) | 34 (29.3) | 26 (23.4) |
| Sore throat                                   | 65 (57.0) | 63 (54.3) | 54 (48.6) |
| Shortness of breath (difficulty breathing)    | 8 (7.0)   | 8 (6.9)   | 1 (0.9)   |
| Cough                                         | 48 (42.1) | 46 (39.7) | 49 (44.1) |
| Systemic symptoms                             |           |           |           |
| Low energy or tiredness                       | 37 (32.5) | 42 (36.2) | 27 (24.3) |
| Muscle or body aches                          | 26 (22.8) | 19 (16.4) | 23 (20.7) |
| Headache                                      | 28 (24.6) | 30 (25.9) | 24 (21.6) |
| Chills or shivering                           | 31 (27.2) | 20 (17.2) | 17 (15.3) |

|                                                                                   |           |           |           |
|-----------------------------------------------------------------------------------|-----------|-----------|-----------|
| Feeling hot or feverish                                                           | 43 (37.7) | 41 (35.3) | 36 (32.4) |
| Digestive symptoms                                                                |           |           |           |
| Nausea                                                                            | 4 (3.5)   | 5 (4.3)   | 2 (1.8)   |
| Vomiting                                                                          | 3 (2.6)   | 3 (2.6)   | 2 (1.8)   |
| Diarrhea                                                                          | 6 (5.3)   | 6 (5.2)   | 8 (7.2)   |
| Sensation disturbance                                                             |           |           |           |
| Anosmia                                                                           | 16 (14.0) | 10 (8.6)  | 10 (9.0)  |
| Dysgeusia                                                                         | 19 (16.7) | 7 (6.0)   | 9 (8.1)   |
| Total score of 12 COVID-19 symptoms, mean (SD) <sup>b</sup>                       | 9.9 (5.0) | 9.3 (4.5) | 8.6 (3.8) |
| Patients with fever (body temperature $\geq 37.0^{\circ}\text{C}$ ), <i>n</i> (%) | 45 (39.5) | 39 (33.6) | 30 (27.0) |

<sup>a</sup>In Japan, patients were eligible for enrollment irrespective of treatment settings (inpatient, outpatient, recuperation at home, or recuperation at designated hotels) because some of them required hospitalization or recuperation for the purpose of isolation or clinical trial participation, regardless of disease severity, at the time of this research. <sup>b</sup>*n*=110, *n*=113, and *n*=110 for the ensitelvir 125 mg, ensitelvir 250 mg, and placebo groups, respectively.

COVID-19, coronavirus disease 2019; ITT, intention-to-treat; SD, standard deviation.

**Table 2 Time-weighted average change from baseline up to 120 hours in the total score of 12 COVID-19 symptoms (ITT population)**

| <b>Statistics</b>                                              | <b>Ensitrelvir 125 mg<br/>(N=114)</b> | <b>Ensitrelvir 250 mg<br/>(N=116)</b> | <b>Placebo<br/>(N=111)</b> |
|----------------------------------------------------------------|---------------------------------------|---------------------------------------|----------------------------|
| <i>N</i>                                                       | 109                                   | 113                                   | 110                        |
| Mean (SD) change from baseline                                 | -5.95 (4.02)                          | -5.42 (3.70)                          | -4.92 (3.25)               |
| LS mean (SE) change from baseline assessed by ANCOVA           | -5.37 (0.24)                          | -5.17 (0.23)                          | -5.12 (0.24)               |
| LS mean (SE) difference in change from baseline versus placebo | -0.24 (0.30)                          | -0.04 (0.29)                          | –                          |
| 95% CI                                                         | -0.83 to 0.34                         | -0.62 to 0.53                         | –                          |
| <i>P</i> -value                                                | 0.4171                                | 0.8806                                | –                          |

ANCOVA, analysis of covariance; CI, confidence interval; COVID-19, coronavirus disease 2019; ITT, intention-to-treat; LS, least squares; SD, standard deviation; SE, standard error.

**Table 3 Summary of TEAEs (safety analysis population)**

| <b>Patients with events, <i>n</i> (%)</b>                 | <b>Ensitrelvir 125 mg<br/>(<i>N</i>=140)</b> | <b>Ensitrelvir 250 mg<br/>(<i>N</i>=140)</b> | <b>Placebo<br/>(<i>N</i>=141)</b> |
|-----------------------------------------------------------|----------------------------------------------|----------------------------------------------|-----------------------------------|
| Patients with any TEAE                                    | 48 (34.3)                                    | 60 (42.9)                                    | 44 (31.2)                         |
| Patients with any treatment-related AE                    | 19 (13.6)                                    | 31 (22.1)                                    | 7 (5.0)                           |
| Patients with any serious TEAE                            | 0 (0.0)                                      | 0 (0.0)                                      | 2 (1.4)                           |
| Patients with TEAEs leading to death                      | 0 (0.0)                                      | 0 (0.0)                                      | 0 (0.0)                           |
| Patients with TEAEs leading to treatment discontinuation  | 2 (1.4)                                      | 0 (0.0)                                      | 0 (0.0)                           |
| TEAEs occurring in $\geq 2\%$ of patients in either group |                                              |                                              |                                   |
| Dyslipidemia                                              | 0 (0.0)                                      | 3 (2.1)                                      | 0 (0.0)                           |
| Headache                                                  | 3 (2.1)                                      | 3 (2.1)                                      | 0 (0.0)                           |
| Diarrhea                                                  | 2 (1.4)                                      | 3 (2.1)                                      | 1 (0.7)                           |
| Abdominal pain upper                                      | 0 (0.0)                                      | 0 (0.0)                                      | 4 (2.8)                           |
| Rash                                                      | 2 (1.4)                                      | 1 (0.7)                                      | 3 (2.1)                           |
| Back pain                                                 | 1 (0.7)                                      | 3 (2.1)                                      | 1 (0.7)                           |
| High-density lipoprotein decrease                         | 31 (22.1)                                    | 40 (28.6)                                    | 5 (3.5)                           |
| Blood triglycerides increase                              | 1 (0.7)                                      | 9 (6.4)                                      | 1 (0.7)                           |

|                                                                           |          |           |         |
|---------------------------------------------------------------------------|----------|-----------|---------|
| Blood creatine phosphokinase increase                                     | 0 (0.0)  | 0 (0.0)   | 4 (2.8) |
| Treatment-related AEs occurring in $\geq 5\%$ of patients in either group |          |           |         |
| High-density lipoprotein decrease                                         | 13 (9.3) | 22 (15.7) | 0 (0.0) |

AE, adverse event; TEAE, treatment-emergent AE.

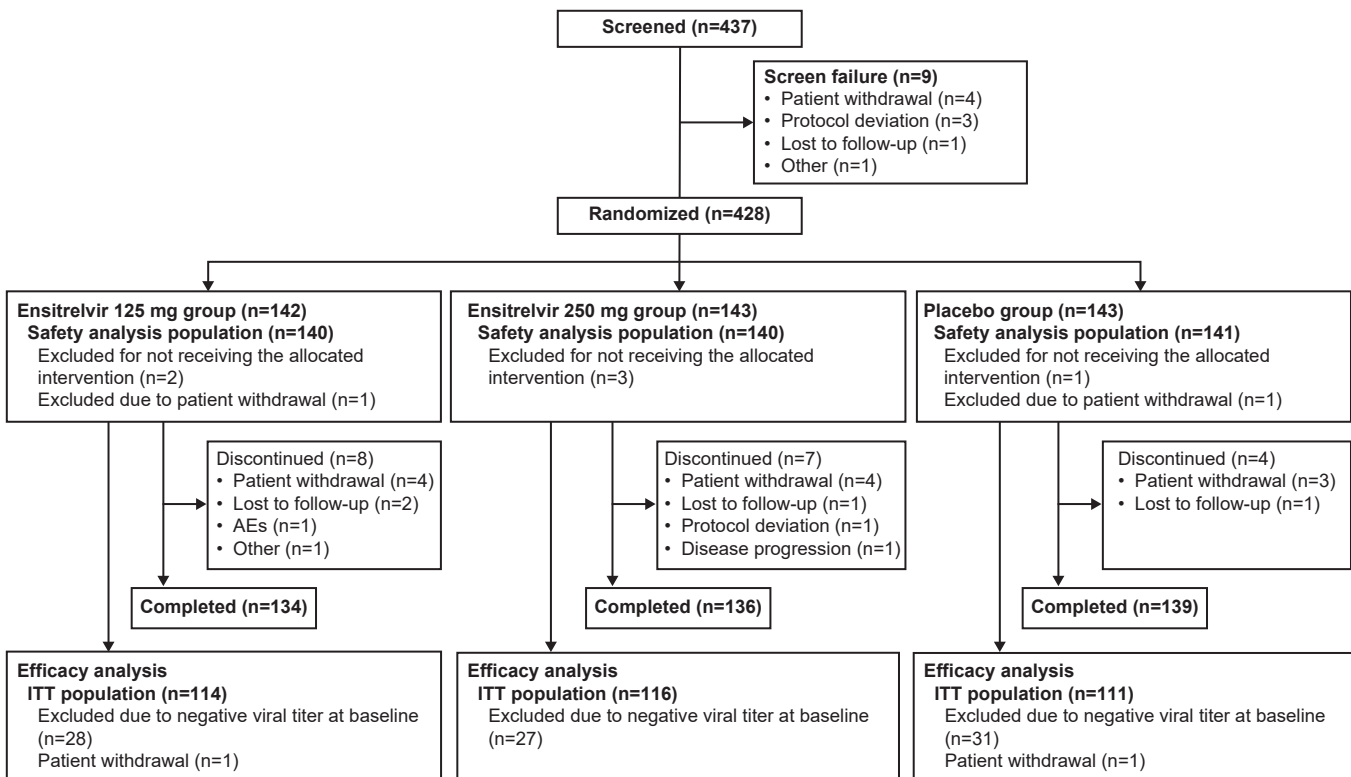

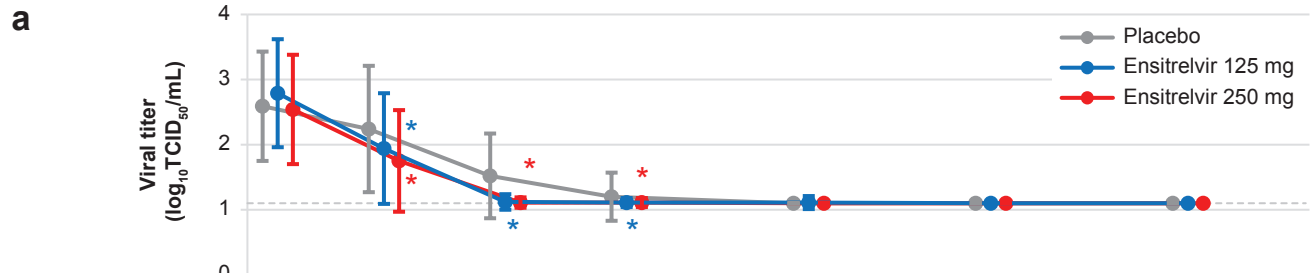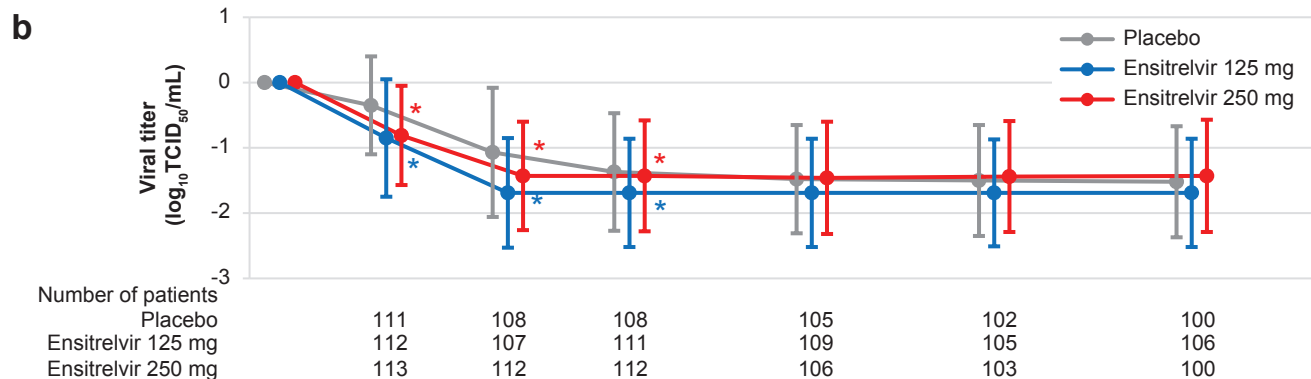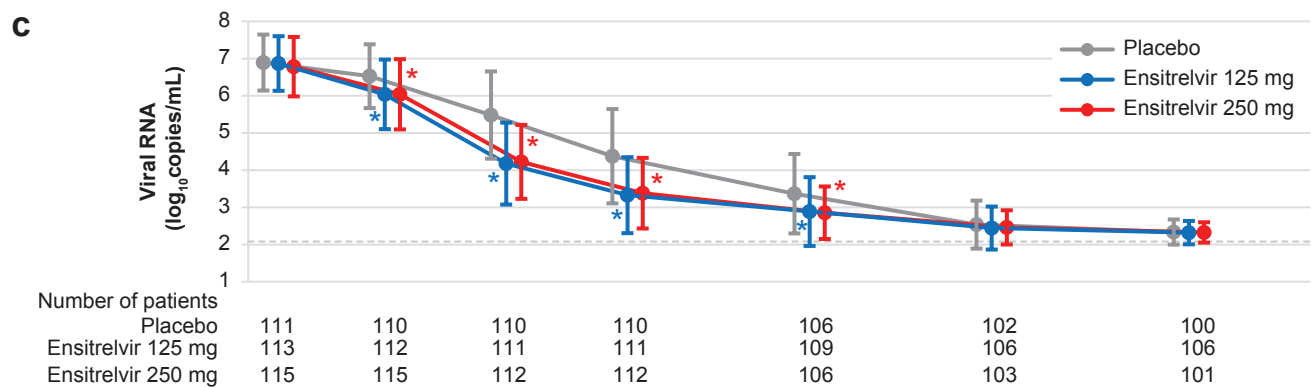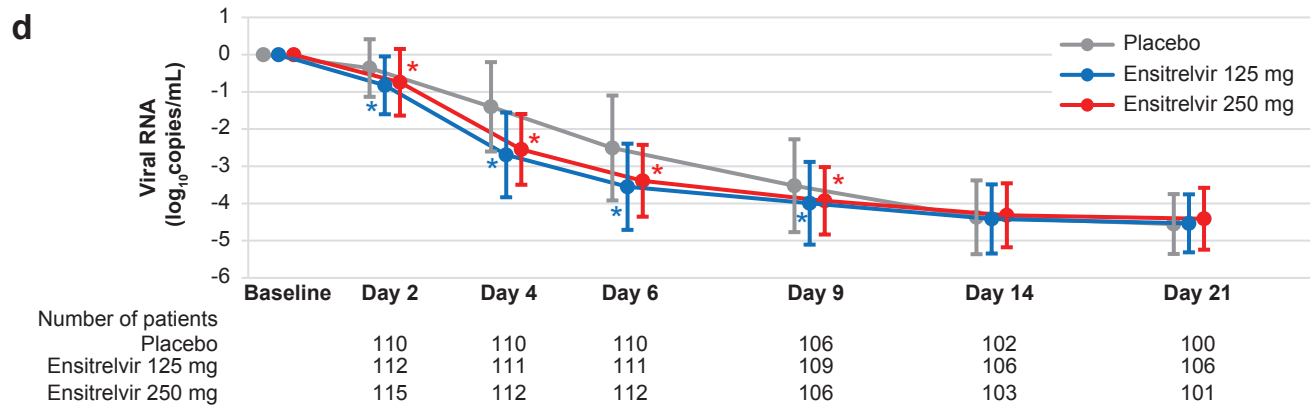

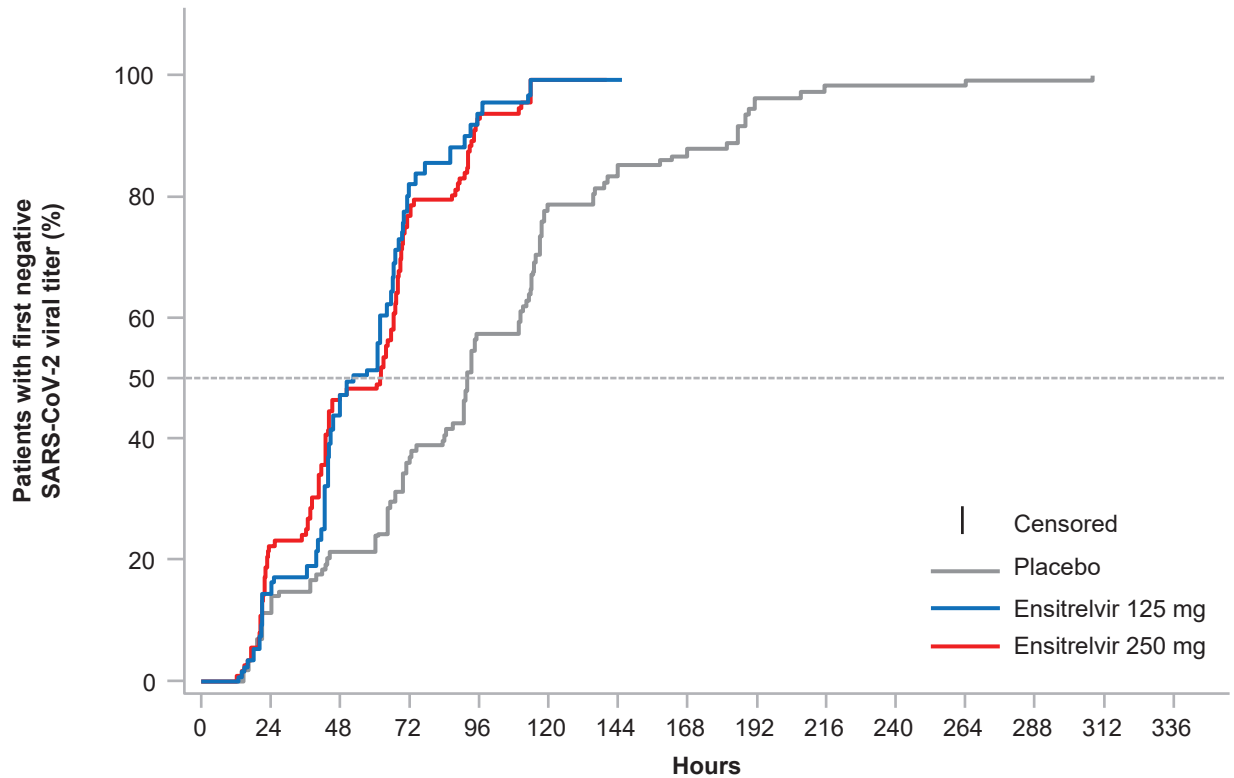

Number at risk

|                    |     |    |    |    |    |    |    |    |   |   |   |   |   |   |   |
|--------------------|-----|----|----|----|----|----|----|----|---|---|---|---|---|---|---|
| Placebo            | 108 | 95 | 85 | 69 | 46 | 23 | 17 | 14 | 4 | 3 | 2 | 2 | 1 | 0 | 0 |
| Ensitrelvir 125 mg | 111 | 93 | 58 | 20 | 7  | 1  | 1  | 0  | 0 | 0 | 0 | 0 | 0 | 0 | 0 |
| Ensitrelvir 250 mg | 113 | 87 | 59 | 26 | 8  | 1  | 0  | 0  | 0 | 0 | 0 | 0 | 0 | 0 | 0 |

|                                          | Ensitrelvir 125 mg<br>n = 111 | Ensitrelvir 250 mg<br>n = 113 | Placebo<br>n = 108 |
|------------------------------------------|-------------------------------|-------------------------------|--------------------|
| Median (hours) [95% CI]                  | 51.3 [44.1, 61.8]             | 62.1 [43.7, 66.5]             | 91.9 [84.0, 109.9] |
| Difference from placebo (hours) [95% CI] | -40.6 [-58.5, -26.5]          | -29.8 [-52.0, -23.6]          | -                  |
| P Value                                  | <.0001                        | <.0001                        | -                  |



**a**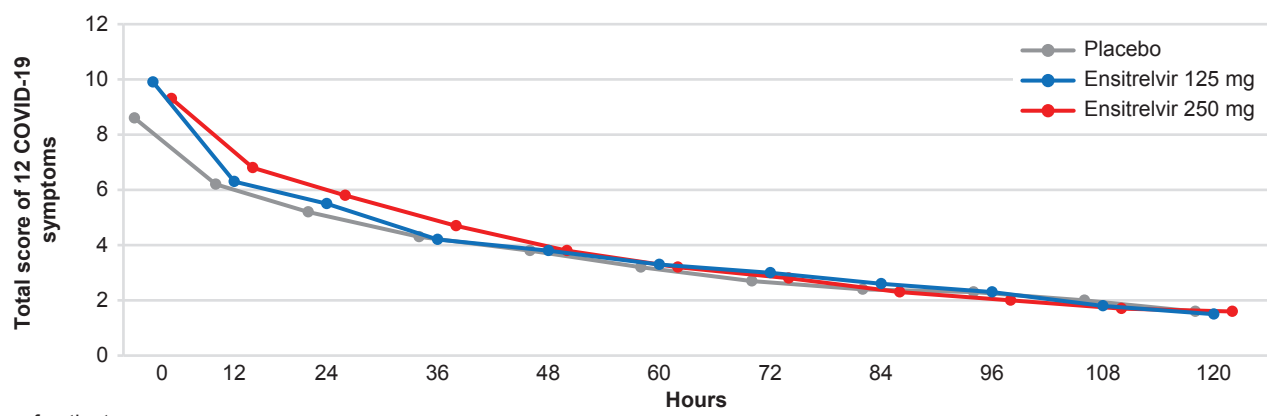

Number of patients

|                    |     |     |     |    |     |    |     |     |     |     |    |
|--------------------|-----|-----|-----|----|-----|----|-----|-----|-----|-----|----|
| Placebo            | 110 | 94  | 106 | 98 | 103 | 96 | 105 | 99  | 102 | 100 | 96 |
| Ensitrelvir 125 mg | 110 | 100 | 105 | 96 | 108 | 95 | 108 | 98  | 105 | 98  | 96 |
| Ensitrelvir 250 mg | 113 | 98  | 110 | 98 | 107 | 96 | 102 | 102 | 101 | 95  | 98 |

**b**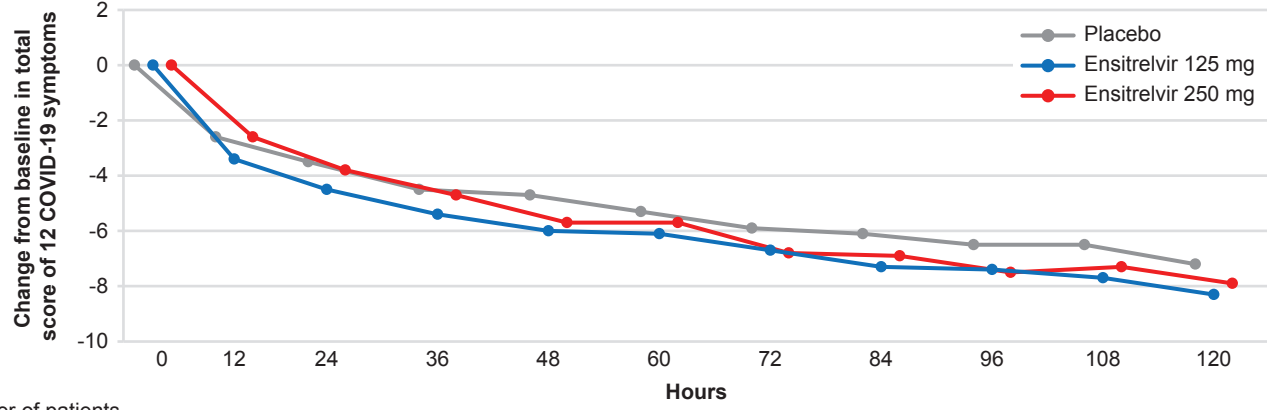

Number of patients

|                    |    |     |    |     |    |     |     |     |    |    |
|--------------------|----|-----|----|-----|----|-----|-----|-----|----|----|
| Placebo            | 93 | 106 | 97 | 102 | 95 | 104 | 98  | 101 | 99 | 95 |
| Ensitrelvir 125 mg | 97 | 102 | 93 | 106 | 93 | 105 | 96  | 102 | 96 | 93 |
| Ensitrelvir 250 mg | 96 | 108 | 96 | 105 | 94 | 100 | 100 | 99  | 93 | 96 |

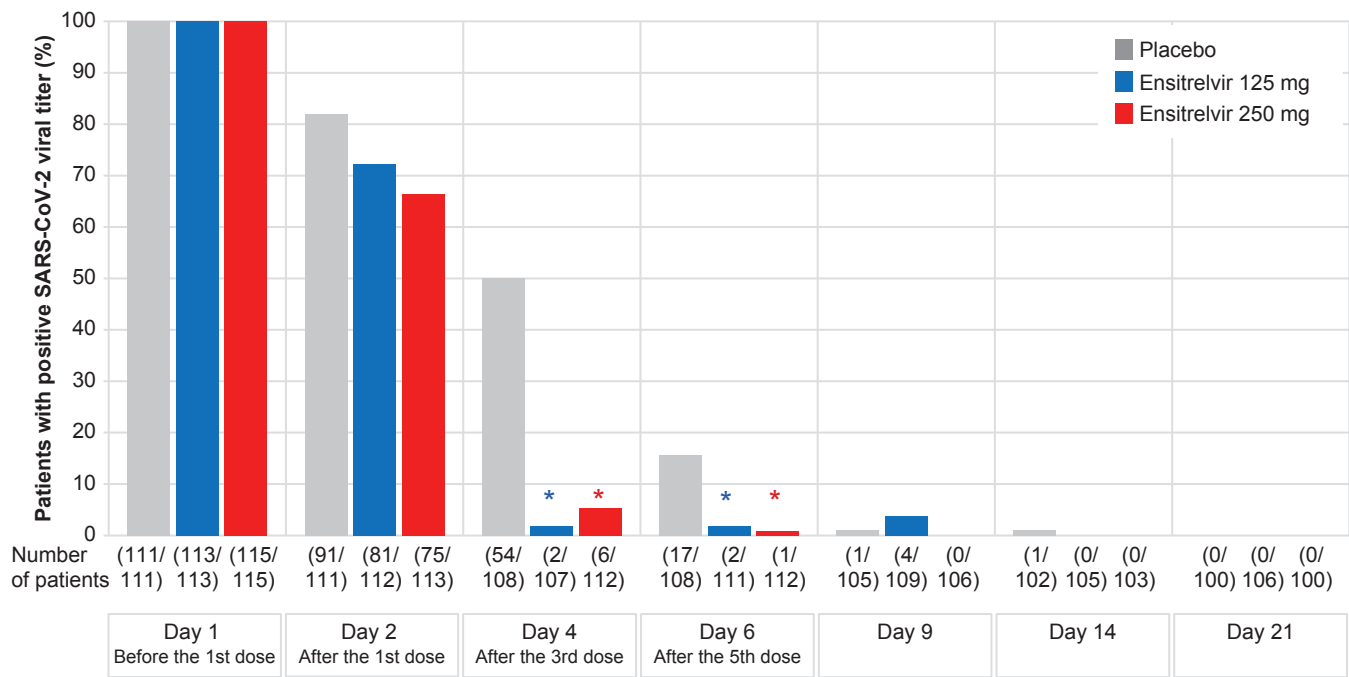

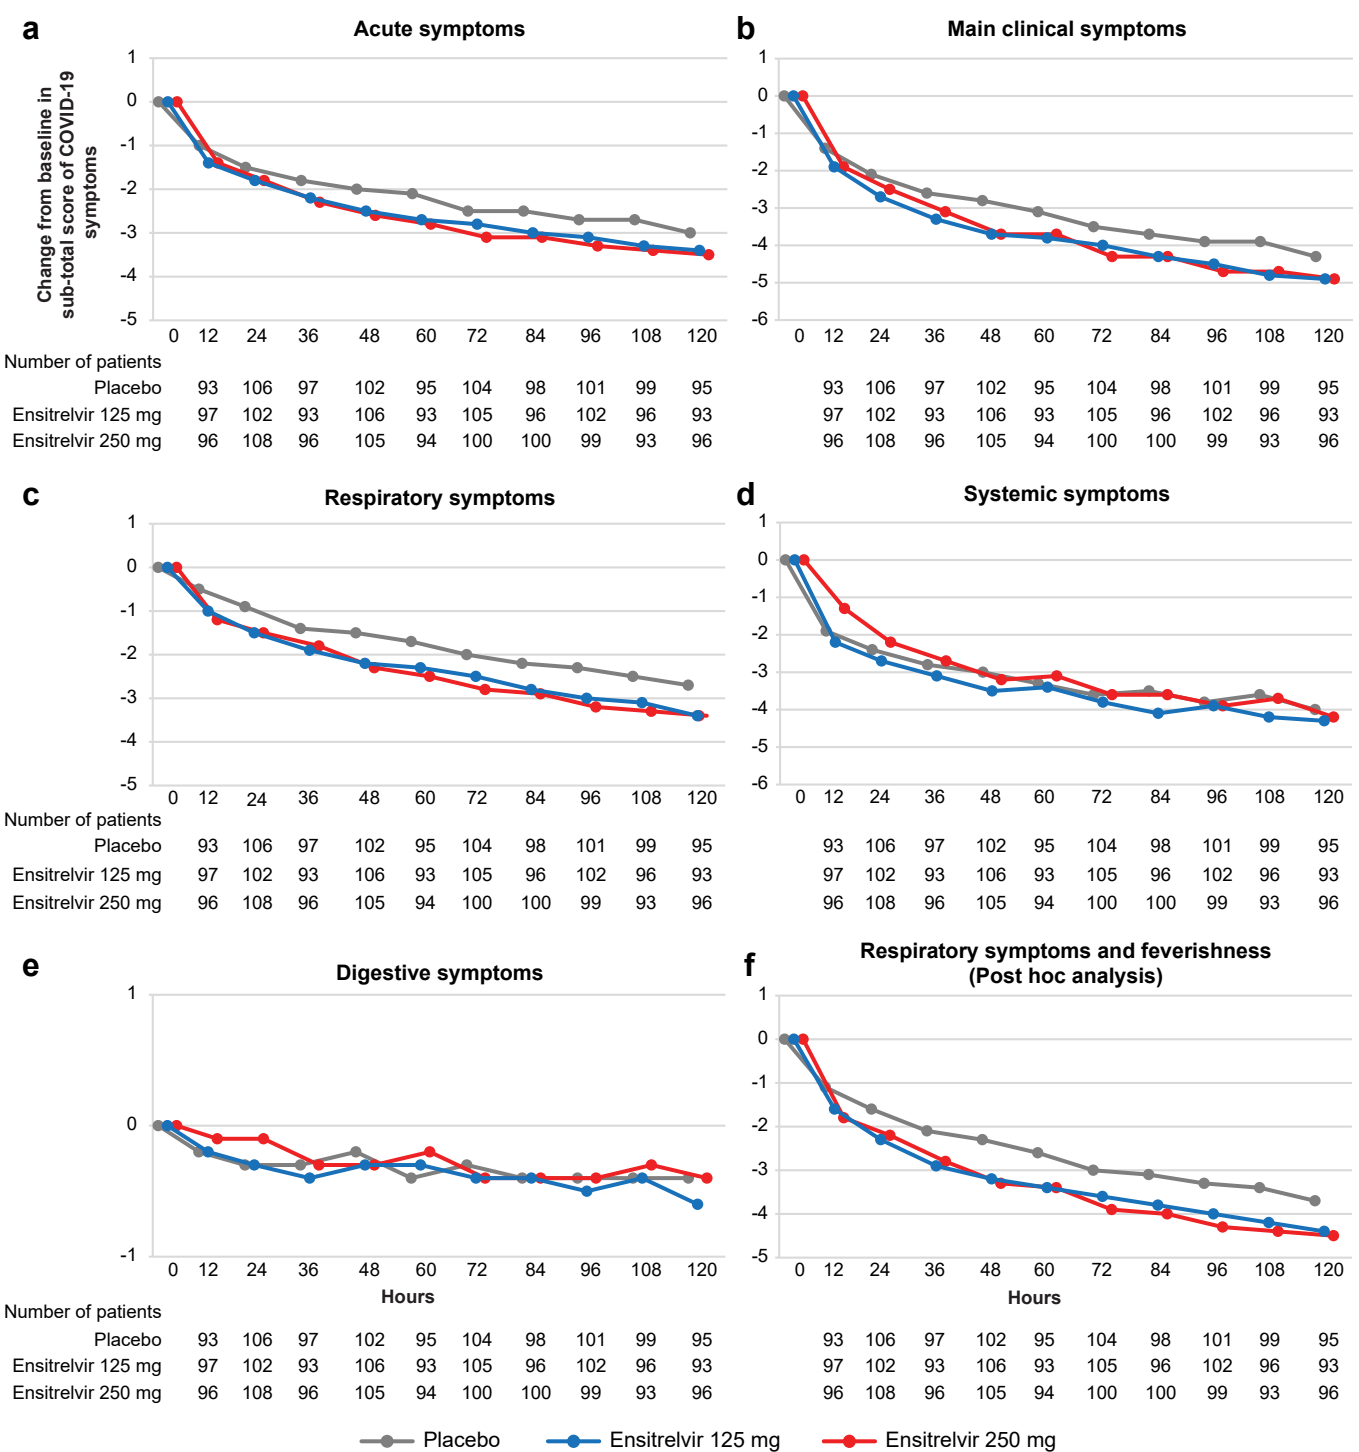

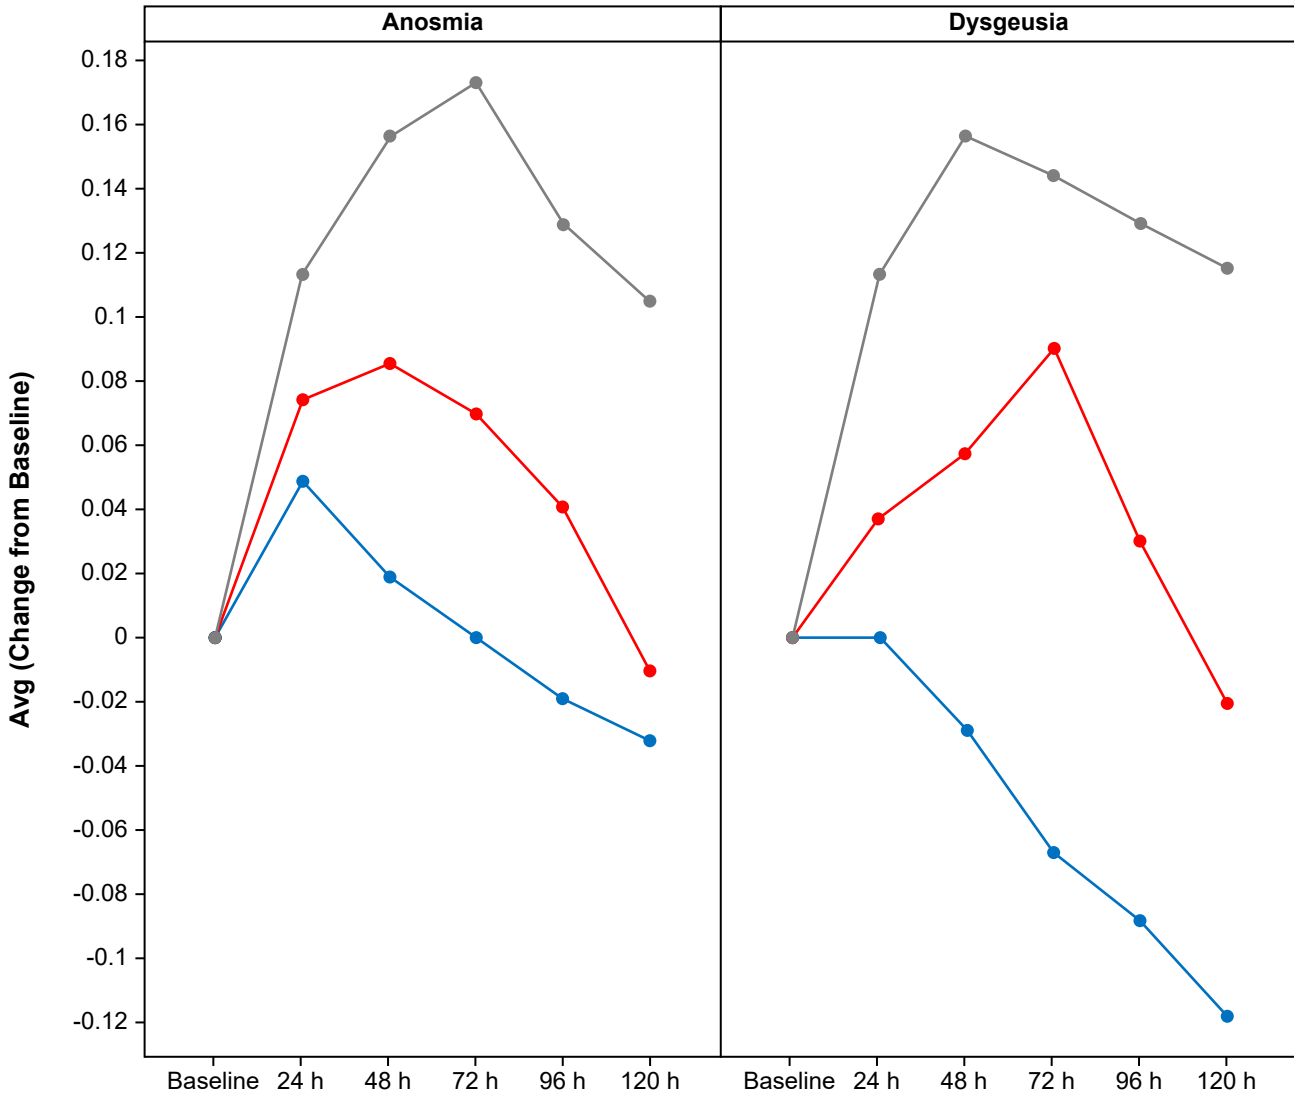

| Number of patients | Baseline | 24 h | 48 h | 72 h | 96 h | 120 h | Baseline | 24 h | 48 h | 72 h | 96 h | 120 h |
|--------------------|----------|------|------|------|------|-------|----------|------|------|------|------|-------|
| Ensitrelvir 125 mg | 102      | 106  | 105  | 102  | 93   |       | 102      | 106  | 105  | 102  | 93   |       |
| Ensitrelvir 250 mg | 108      | 105  | 100  | 99   | 96   |       | 108      | 105  | 100  | 99   | 96   |       |
| Placebo            | 106      | 102  | 104  | 101  | 95   |       | 106      | 102  | 104  | 101  | 95   |       |

Placebo
  Ensitrelvir 125 mg
  Ensitrelvir 250 mg

**a****HDL cholesterol (mmol/L)**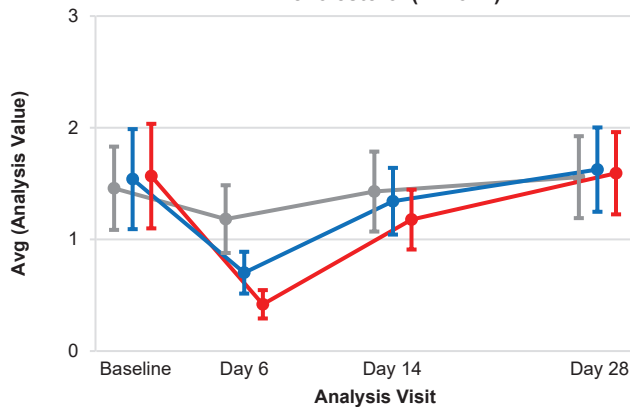

Number of patients

|                    |     |     |     |     |
|--------------------|-----|-----|-----|-----|
| Ensitrelvir 125 mg | 140 | 137 | 131 | 128 |
| Ensitrelvir 250 mg | 140 | 134 | 127 | 130 |
| Placebo            | 141 | 139 | 129 | 130 |

**b****Triglycerides (mmol/L)**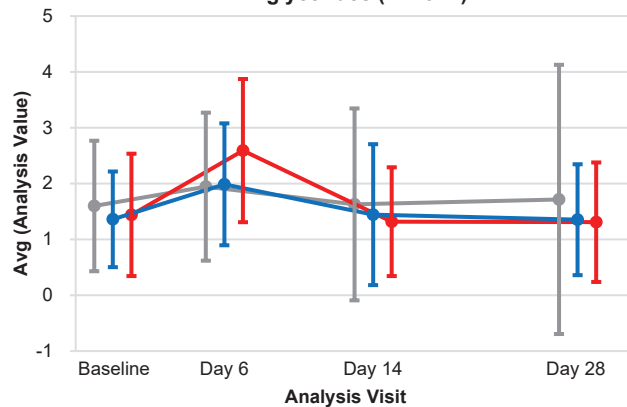

|  |     |     |     |     |
|--|-----|-----|-----|-----|
|  | 140 | 137 | 131 | 128 |
|  | 140 | 134 | 127 | 130 |
|  | 141 | 139 | 129 | 130 |

**c****Total bilirubin ( $\mu\text{mol/L}$ )**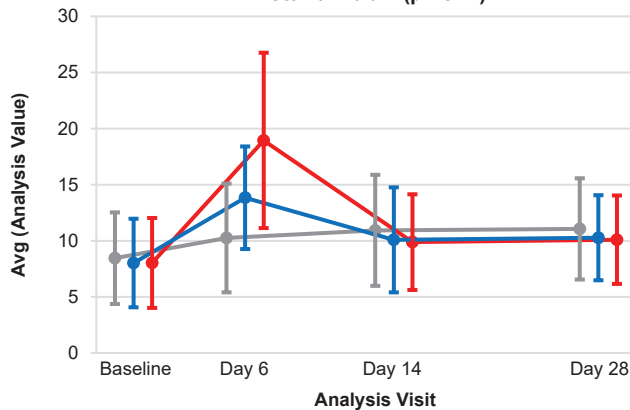

Number of patients

|                    |     |     |     |     |
|--------------------|-----|-----|-----|-----|
| Ensitrelvir 125 mg | 140 | 138 | 131 | 128 |
| Ensitrelvir 250 mg | 140 | 134 | 127 | 130 |
| Placebo            | 141 | 139 | 129 | 130 |

**d****Iron ( $\mu\text{mol/L}$ )**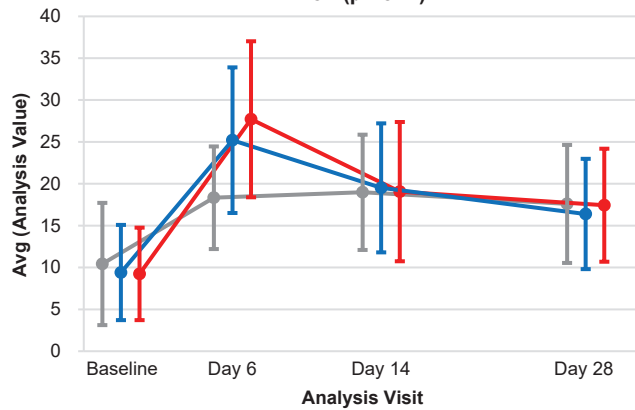

|  |     |     |     |     |
|--|-----|-----|-----|-----|
|  | 138 | 136 | 129 | 126 |
|  | 137 | 131 | 124 | 127 |
|  | 138 | 136 | 126 | 127 |

● Placebo    ● Ensitrelvir 125 mg    ● Ensitrelvir 250 mg
